# Supplementary material for: Toward the design of superabsorbent materials for non-polar organic solvents and oils: ionic content dependent swelling behaviour of cross-linked poly(octadecyl acrylate)-based lipophilic polyelectrolytes
Source: Royal Society of Chemistry journal article supplement (doi:10.1039/c2jm32747c), 2012-01-01
Supplement: c2jm32747c.pdf [file c2jm32747c.pdf]

## Supplementary Information

### **Toward the design of superabsorbent materials for non-polar organic solvents and oils: Ionic content dependent swelling behaviour of cross-linked poly(octadecyl acrylate)-based lipophilic polyelectrolytes**

*Toshikazu Ono<sup>a</sup> and Kazuki Sada<sup>b\*</sup>*

<sup>a</sup> *Department of Chemistry and Biochemistry, Graduate School of Engineering, Kyushu University, 744 Motoooka, Nishi-ku, Fukuoka 819-0395 (Japan).*

<sup>b</sup> *Department of Chemistry, Faculty of Science, Hokkaido University, Sapporo 060-0810 (Japan)*

\* to whom correspondence should be addressed: [sadatcm@mail.sci.hokudai.ac.jp](mailto:sadatcm@mail.sci.hokudai.ac.jp)

**Table S1.** Swelling behaviors of lipophilic polyelectrolyte gels (**EG18(X%)**) and nonionic gel (**NG18**) in various organic solvents.

|                      | $\epsilon$ | Swelling degree (Q) |                        |                        |                        |                        |                       |
|----------------------|------------|---------------------|------------------------|------------------------|------------------------|------------------------|-----------------------|
|                      |            | <b>NG18</b>         | <b>EG18<br/>(1.0%)</b> | <b>EG18<br/>(2.5%)</b> | <b>EG18<br/>(5.0%)</b> | <b>EG18<br/>(7.5%)</b> | <b>EG18<br/>(10%)</b> |
| hexane               | 1.9        | 11                  | 21                     | 21                     | 12                     | 15                     | 12                    |
| toluene              | 2.4        | 25                  | 35                     | 31                     | 24                     | 18                     | 13                    |
| chloroform           | 4.8        | 49                  | 89                     | 85                     | 99                     | 95                     | 211                   |
| tetrahydropyran      | 5.6        | 33                  | 53                     | 59                     | 93                     | 72                     | 124                   |
| chlorobenzene        | 5.6        | 35                  | 63                     | 48                     | 70                     | 93                     | 159                   |
| ethyl acetate        | 6.0        | 0.4                 | 1.4                    | 1.9                    | 1.3                    | 3.1                    | 2.4                   |
| 1-chlorobutane       | 7.4        | 40                  | 64                     | 84                     | 89                     | 101                    | 202                   |
| tetrahydrofuran      | 7.6        | 23                  | 72                     | 82                     | 122                    | 147                    | 217                   |
| 2-octanol            | 8.2        | 2.0                 | 1.6                    | 0.8                    | 1.9                    | 0.2                    | 0.9                   |
| dichloromethane      | 8.9        | 25                  | 111                    | 150                    | 128                    | 201                    | 324                   |
| 1,2-dichloroethane   | 10.4       | 2.5                 | 5.1                    | 72                     | 158                    | 164                    | 369                   |
| 2-octanone           | 10.4       | 1.7                 | 2.1                    | 2.7                    | 3.3                    | 123                    | 238                   |
| 2-heptanone          | 12.0       | 1.2                 | 1.3                    | 0.8                    | 3.4                    | 124                    | 214                   |
| 4-methyl-2-heptanone | 13.1       | 1.3                 | 0.5                    | 0.7                    | 2.4                    | 103                    | 234                   |
| cyclopentanone       | 13.6       | 0.5                 | 1.3                    | 2.6                    | 3.1                    | 5.2                    | 4.4                   |
